# Supplementary material
Source: publisher site journal article supplement (https://www.spandidos-publications.com/2894/downloadSupplementary)

Figure S1. Association between BET mRNA expression levels and NSCLC. The mRNA expression levels for each BET member in the primary tumor of lung adenocarcinoma (LUAD) or lung squamous cell carcinoma (LUSC) of patients with lung cancer as well as normal lung tissues of healthy individuals are presented according to the datasets in TCGA database. P-values are presented as indicated.

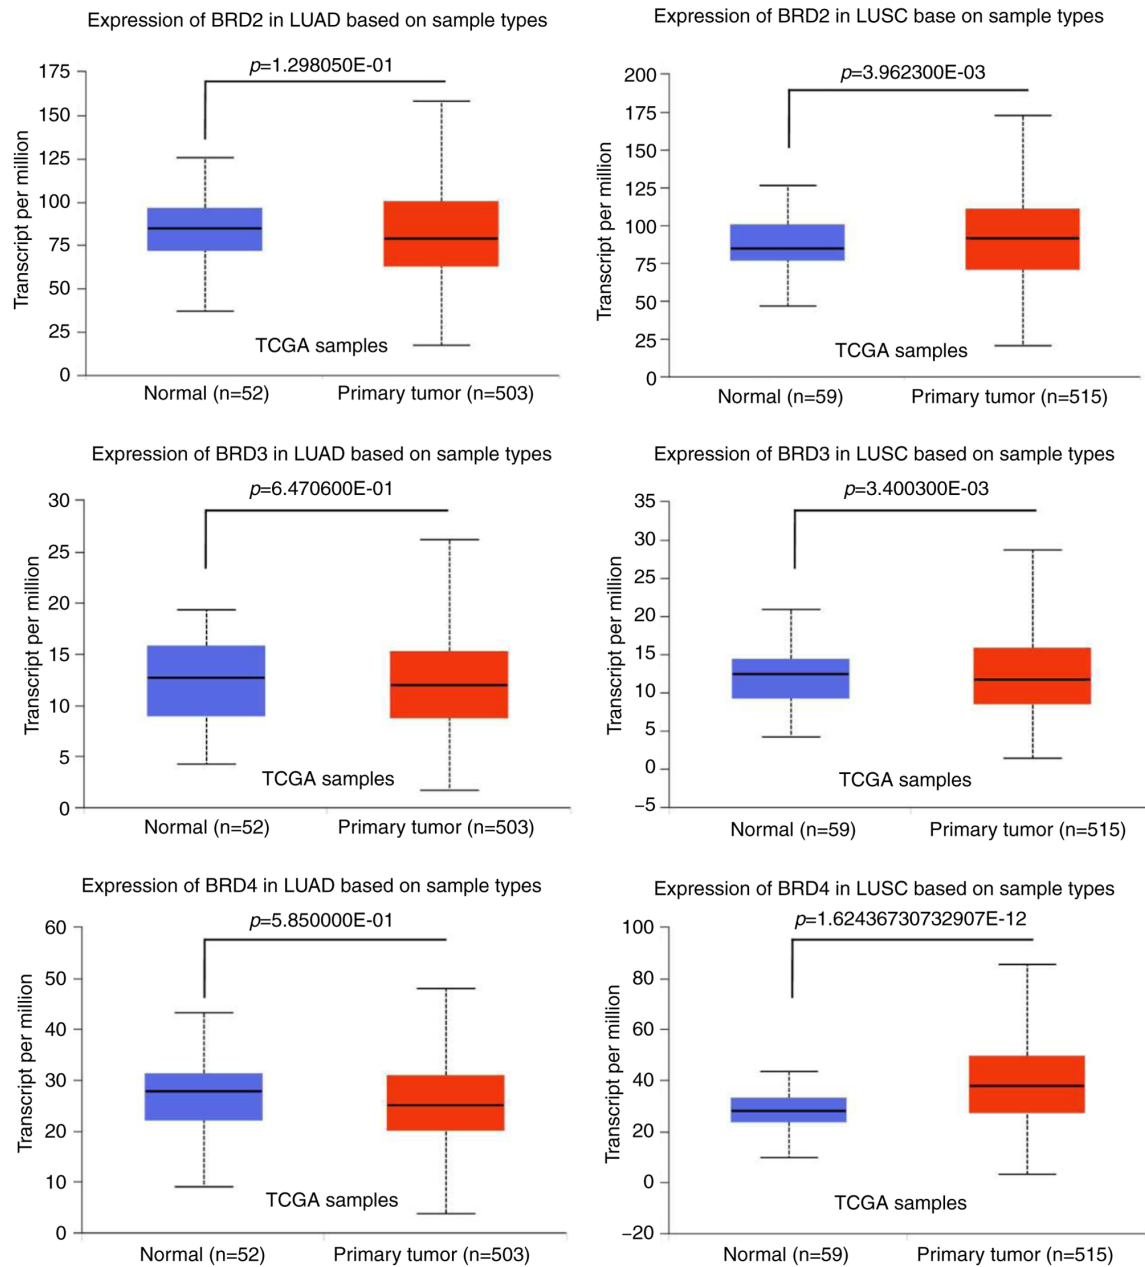

Supplement: Supplementary file 1 [file downloadSupplementary]
